# Supplementary material for: Biophysical analysis of sialic acid recognition by the complement regulator Factor H
Source: PubMed Central journal article supplement — Glycobiology. 2018 Jul 27;28(10):765–73. doi: 10.1093/glycob/cwy061 (PMC6142864; doi:10.1093/glycob/cwy061), 2018-07-27
Supplement: cwy061_si_fh_neu5ac.pdf [file cwy061_si_fh_neu5ac.pdf]

# FH N-glycosylation sites (N-X<sub>≠P</sub>-S/T)

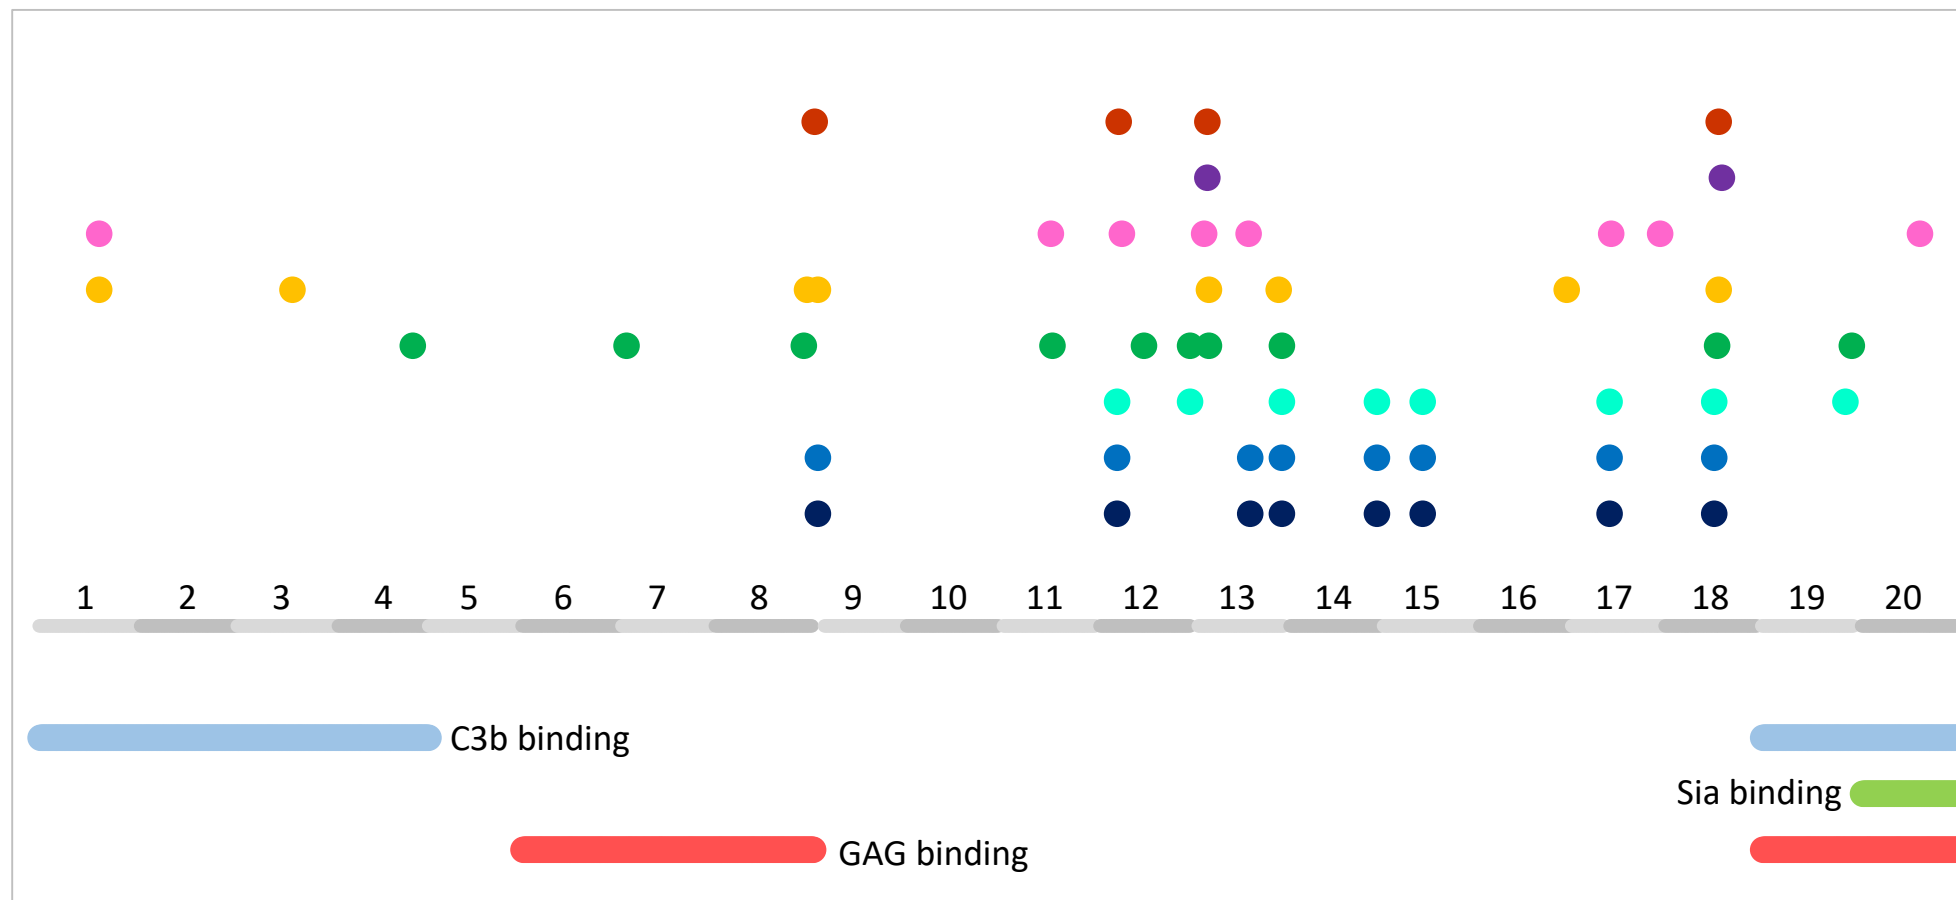

● HUMAN ● CHIMPANZEE ● ORANGUTAN ● RABBIT ● HORSE ● MOUSE ● CATTLE ● PIG ● C3b ● Sia ● GAGs
